# Supplementary material for: Integrative genome-wide analysis reveals HLP1, a novel RNA-binding protein, regulates plant flowering by targeting alternative polyadenylation
Source: PubMed Central journal article supplement — Cell Res. 2015 Jun 23;25(7):864–76. doi: 10.1038/cr.2015.77 (PMC4493284; doi:10.1038/cr.2015.77), 2015-06-23
Supplement: cr201577x2.pdf [file cr201577x2.pdf]

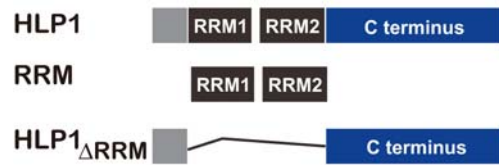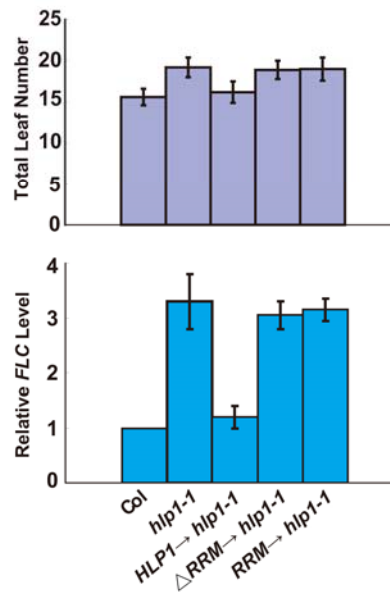

**Supplementary information, Figure S2** The RRM1 and RRM2 of HLP1 are required but insufficient for promoting floral transition.

*GFP-HLP1*, *GFP-HLP1 $\Delta$ RRM* and *GFP-RRM* constructs driven by the *35S* promoter were transformed into the *hlp1-1* mutants, respectively. Flowering time was assessed by counting total leaf number of the indicated strains (upper panel). *FLC* transcription levels were determined by RT-qPCR (lower panel).
