# Supplementary material for: Integrative genome-wide analysis reveals HLP1, a novel RNA-binding protein, regulates plant flowering by targeting alternative polyadenylation
Source: PubMed Central journal article supplement — Cell Res. 2015 Jun 23;25(7):864–76. doi: 10.1038/cr.2015.77 (PMC4493284; doi:10.1038/cr.2015.77), 2015-06-23
Supplement: cr201577x11.pdf [file cr201577x11.pdf]

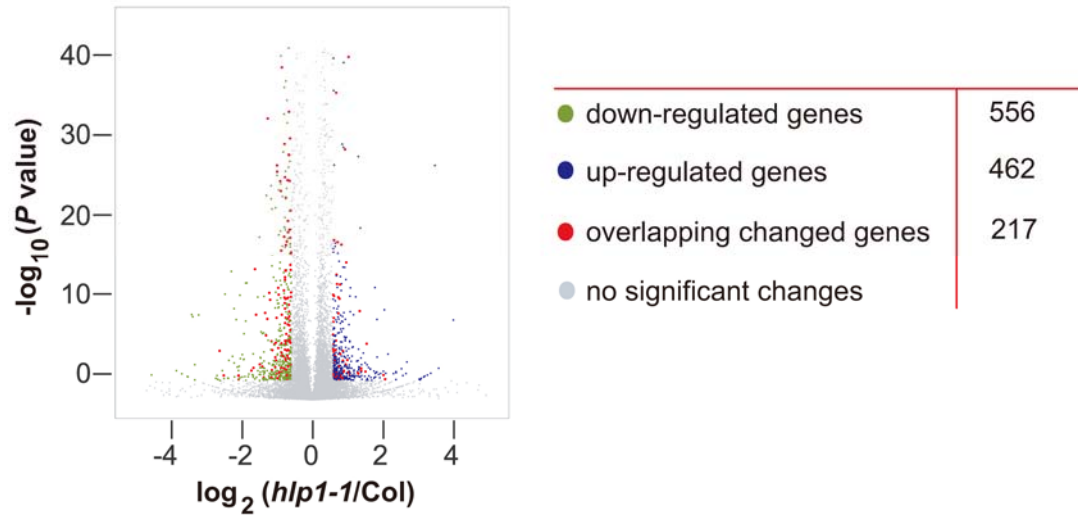

**Supplementary information, Figure S11** Correlation between HLP1 binding and differential gene expression.

The volcano plots show both down-regulated (green dots) and up-regulated genes (blue dots) in the *hlp1-1* mutants. Those differentially expressed genes with HLP1 binding are indicated by red dots. The ratio of expression levels of *hlp1-1* over Col ( $\text{RPKM}_{hlp1-1}/\text{RPKM}_{\text{Col}}$  in  $\log_2$  scale,  $x$ -axis) is plotted against the  $P$  value ( $\log_{10}$  scale,  $y$ -axis).
